# Supplementary material
Source: HighWire-hosted journal article supplement (https://www.cmajopen.ca/highwire/filestream/90504/field_highwire_adjunct_files/1/open-2022-0225-2-at.pdf)
Supplement: open-2022-0225-2-at.pdf [file open-2022-0225-2-at.pdf]

Database: Ovid MEDLINE(R) and Epub Ahead of Print, In-Process, In-Data-Review & Other Non-Indexed Citations, Daily and Versions

- 1 exp Transgender Persons/
- 2 exp Transsexualism/
- 3 exp Sex Reassignment Procedures/
- 4 transgender\*.tw.
- 5 transsexual\*.tw.
- 6 ("trans m#n" or "trans wom#n" or "trans person\*" or transpeople or "trans male\*" or "trans female\*").tw.
- 7 ((gender adj3 (non-binary or agender or fluid\* or trans\* or non-conform\* or nonconform\*)) or gender-nonconform\*).tw.
- 8 gender dysphori\*.tw.
- 9 (sex reassignment\* or gender reassignment\* or gender affirm\*).tw.
- 10 (transfeminine or transmasculine).tw.
- 11 (AFAB or AMAB).tw.
- 12 (gender adj (expression\* or transition\*)).tw.
- 13 (transvestite\* or transvestism).tw.
- 14 ("gender\* identit\*" or "gender\* inclusi\*" or "gender\* nonconform\*" or "gender non-conform\*" or "gender\* divers\*" or "gender\* express\*" or "gender\* neutral\*" or "gender\* norm\*" or "gender\* fluid\*" or "gender\* dyphoria" or agender\* or bigender\* or genderqueer\* or cisnormativ\* or misgender\*).mp.
- 15 exp "Sexual and Gender Minorities"/
- 16 bisexuality/ or exp homosexuality/ or transsexualism/
- 17 gay.ab,ti,kw.
- 18 homosexual\*.ab,ti,kw.
- 19 lesbian\*.ab,ti,kw.
- 20 bisexual\*.ab,ti,kw.
- 21 "men who have sex with men".mp.
- 22 transgender\*.ab,ti,kw.
- 23 queer\*.ab,ti,kw.
- 24 "gender identit\*".mp.
- 25 "sexual minorit\*".mp.
- 26 "sexual identit\*".mp.
- 27 LGBT\*.mp.
- 28 transexual\*.mp.
- 29 transsexual\*.mp.
- 30 trans-sexual\*.mp.
- 31 LGB.ab,ti,kw.
- 32 "same sex marriage\*".mp.
- 33 "gender dysphoria\*".mp.
- 34 "same sex couple\*".mp.
- 35 (non-heterosexual\* or nonheterosexual\*).mp.
- 36 "same sex relationship\*".mp.
- 37 (trans adj2 (people or person\* or female or woman or women or male or man or men)).mp.
- 38 "same sex parent\*".mp.
- 39 "gender reassignment\*".mp.
- 40 ((nonbinary or non-binary) adj2 (gender or person\* or people or patient\*)).mp.
- 41 "gender transition\*".mp.
- 42 ("gender queer" or genderqueer).mp.

- 43 GLBT.mp.
- 44 "same sex attract\*".mp.
- 45 "women who have sex with women".mp.
- 46 "gender transformation\*".mp.
- 47 homophile\*.mp.
- 48 "gender and sexual diversity\*".mp.
- 49 sex transformation\*.mp.
- 50 sexual dissident\*.mp.
- 51 "same gender loving".mp.
- 52 GLBQ.mp.
- 53 heteroflexible.mp.
- 54 lesbian.mp.
- 55 "women loving women".mp.
- 56 bisexual.mp.
- 57 exp Neoplasms/  
58 (neoplasm\* or cancer\* or leukemia or leukaemia or malignan\* or carcinoma or tumor\* or  
tumour\*).ab,ti,kw.
- 59 or/1-56
- 60 or/57-58
- 61 59 and 60
